# Supplementary material for: Synthesis, physicochemical characterization and cytotoxic properties of riboflavin loaded Myrj52–silver nanoparticles
Source: Royal Society of Chemistry journal article supplement (doi:10.1039/c7nj00571g), 2017-01-01

## Supplementary Materials

### Synthesis, Physicochemical Characterization and Cytotoxic Properties of Riboflavin loaded Myrj52-Silver Nanoparticles

Mariana Voicescu<sup>1\*</sup>, Sorana Ionescu<sup>2</sup>, Oana Craciunescu<sup>3</sup>, Rodica Tatia<sup>3</sup>,  
Lucia Moldovan<sup>3</sup>, Valentin S. Teodorescu<sup>4</sup>, Cristina L. Nistor<sup>5</sup>

<sup>1</sup>*Romanian Academy, Institute of Physical Chemistry "Ilie Murgulescu", Splaiul Independentei  
202, 060021 Bucharest, Romania*

<sup>2</sup>*Department of Physical Chemistry, University of Bucharest, Bd Regina Elisabeta 4-12,  
Bucharest 030018, Romania*

<sup>3</sup>*Department of Cellular and Molecular Biology, National Institute of R&D for Biological  
Sciences, Splaiul Independentei 296, 060031, Bucharest, Romania*

<sup>4</sup>*National Institute of Materials Physics, Magurele 077125, Romania*

<sup>5</sup>*Polymer Department, National R&D Institute for Chemistry and Petrochemistry ICECHIM,  
Splaiul Independentei 202, 060021 Bucharest, Romania*

---

\*Corresponding author: E-mail: [voicescu@icf.ro](mailto:voicescu@icf.ro) (M. Voicescu)

**Fig. S1.** Fluorescence emission (A) and excitation (B) spectra of RF in RF-HSA/SNPs systems;  
 $\lambda_{ex} = 365 \text{ nm}$ ;  $\lambda_{em} = 530 \text{ nm}$ ; RF : HSA = 1:1

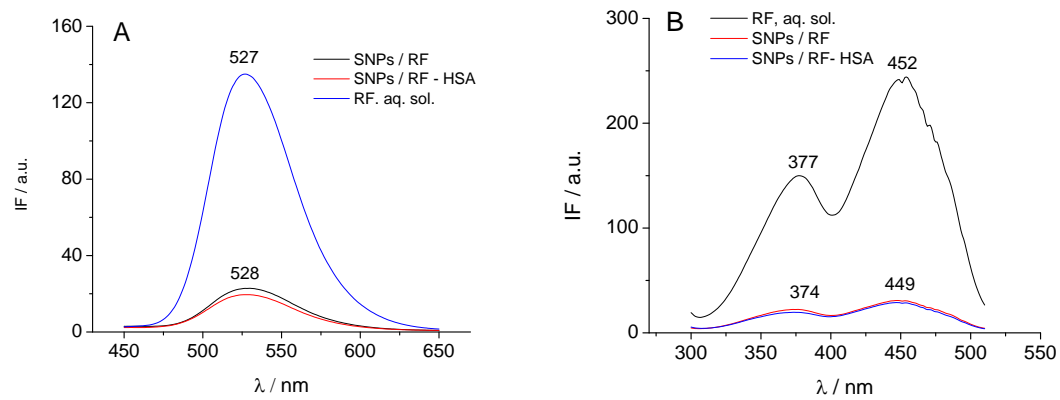

**Fig. S2.** Fluorescence decays for RF at 530 nm. IRF is instrument response function.

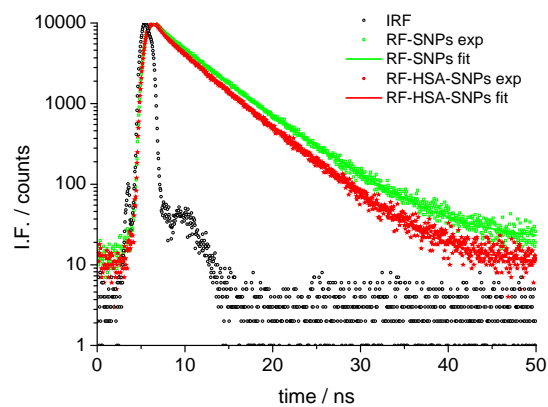

**Fig. S3.** Experimental and fitted spectra of HSA on SNPs in the absence (A) and in the presence of RF (B).

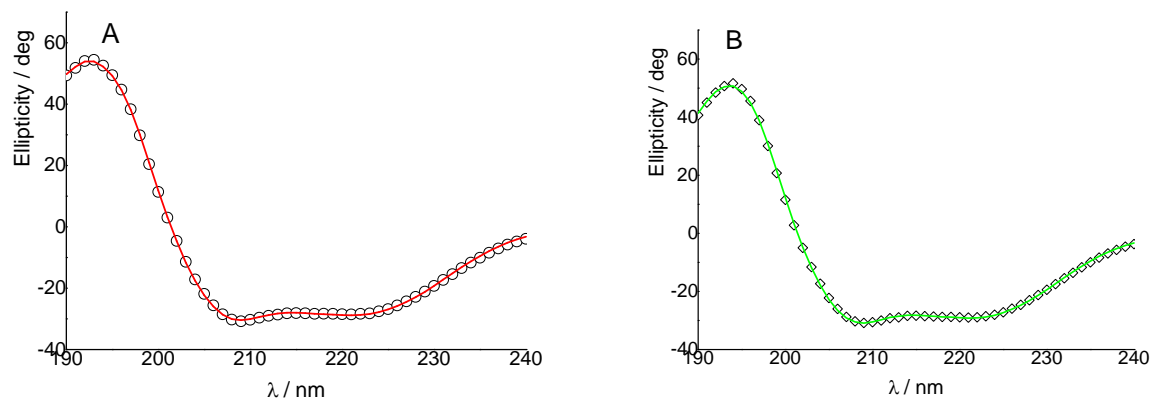

Supplement: c7nj00571g1.pdf [file c7nj00571g1.pdf]
